# Supplementary material for: Controllable synthesis of Sc2Mo3O12microcrystals with exposed {001} facets and their remarkable tunable luminescence properties by doping lanthanides
Source: Royal Society of Chemistry journal article supplement (doi:10.1039/c6ce01640e), 2016-01-01
Supplement: c6ce01640e1.pdf [file c6ce01640e1.pdf]

# Controllable synthesis of $\text{Sc}_2\text{Mo}_3\text{O}_{12}$ microcrystals with exposed {001} facets and their remarkable tunable luminescence properties by doping lanthanides

Bei Zhao,<sup>a</sup> li Yuan,<sup>a</sup> Shanshan Hu,<sup>\*a</sup> Xuemei Zhang,<sup>a</sup> Xianju Zhou,<sup>b</sup> Jianfeng Tang<sup>c</sup> and Jun Yang<sup>\*a</sup>

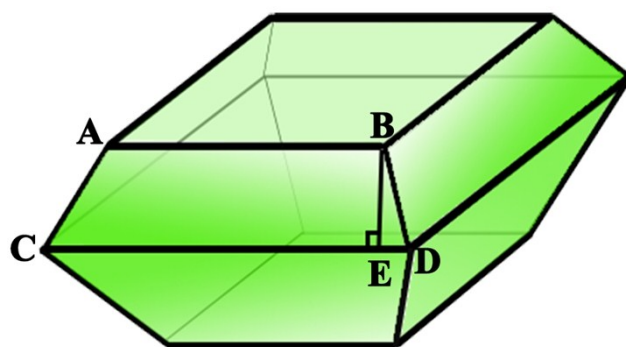

**Fig. S1** The simulated shape of the single scandium molybdate precursor sample. ( $AB = 7.4 \mu\text{m}$ ,  $CD = 10 \mu\text{m}$ ,  $BE = 1.4 \mu\text{m}$ )

$$S_{001} = 2AB^2 = 2 \times 7.4^2 = 109.52 \mu\text{m}^2$$

$$S_{101} = 8 \times \frac{(AB + CD) \times BE}{2} = 8 \times \frac{(10 + 7.4) \times 1.4}{2} = 97.44 \mu\text{m}^2$$

$$S_{001} \% = \frac{S_{001}}{S_{001} + S_{101}} = \frac{109.52}{109.52 + 97.44} = 53\%$$

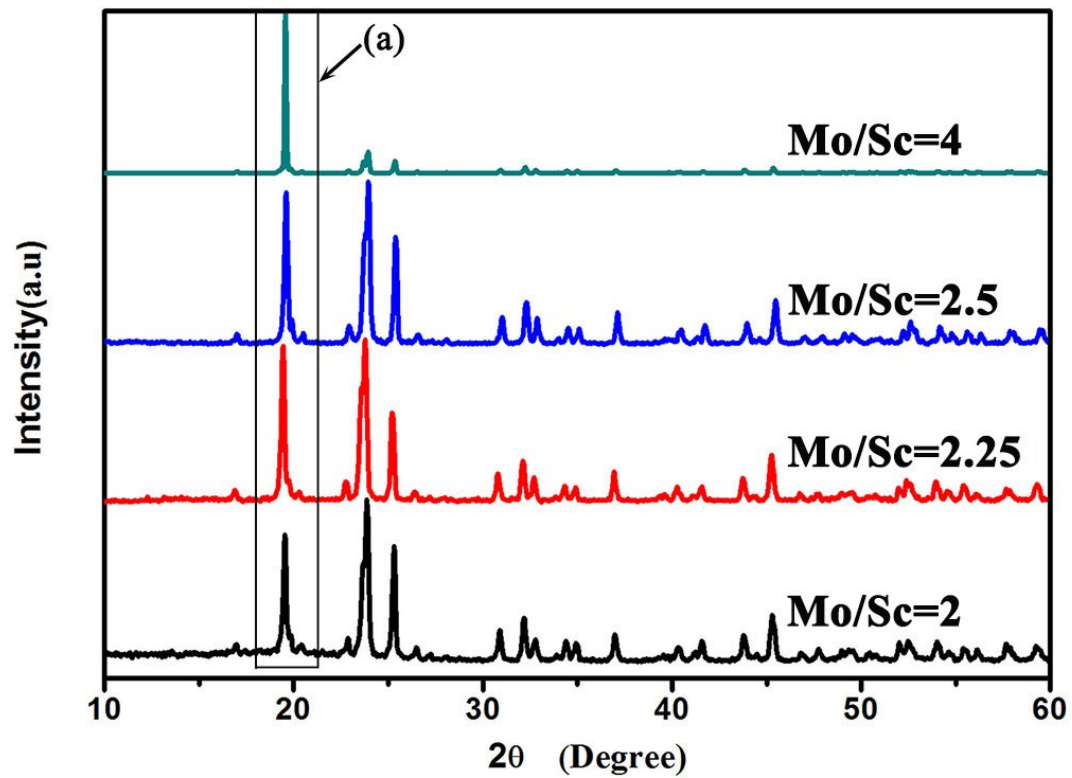

**Fig. S2** XRD patterns of the scandium molybdate precursors produced with different molar ratios of Mo/Sc.

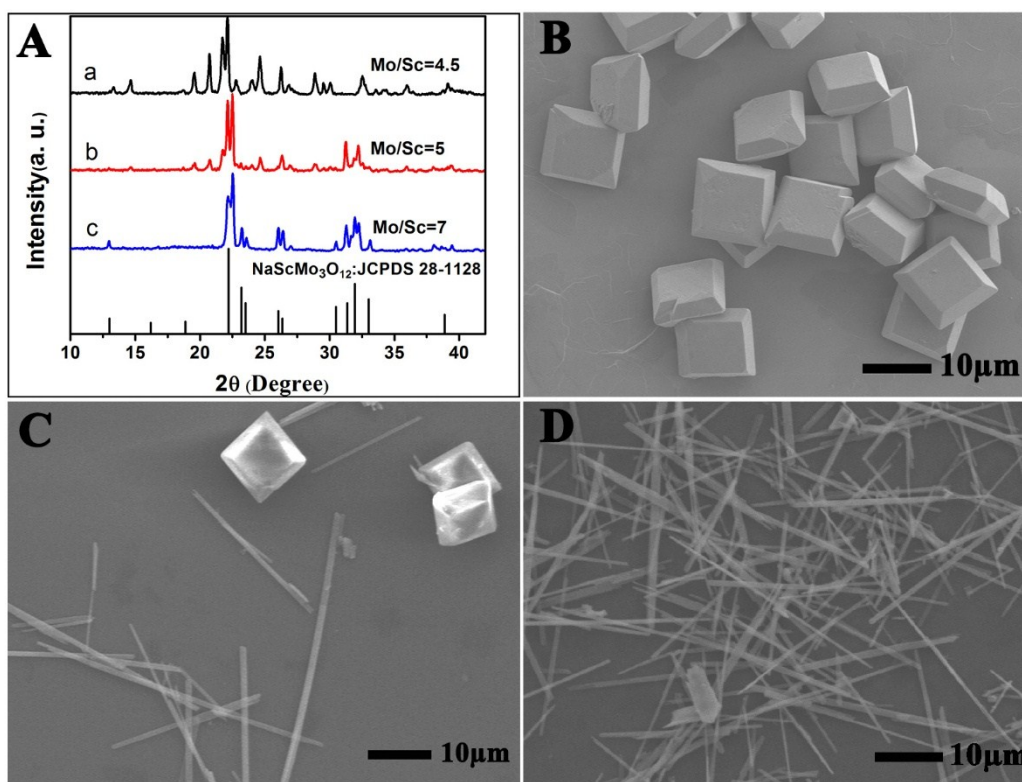

**Fig. S3** XRD patterns (A) and SEM images of the samples synthesized with different molar ratios of Mo/Sc: (B) 4.5, (C) 5 and (D) 7.

Fig. S3 shows XRD patterns and SEM images of the samples obtained with different molar ratios of Mo/Sc. When the molar ratio is 4.5, well defined uniform compressed decahedron microcrystals are observed (Fig. S3B) and pure orthorhombic phase of Sc<sub>2</sub>Mo<sub>3</sub>O<sub>12</sub> without impurity phases are obtained (Fig. S3A). When the molar ratio is adjusted to 5, the SEM image shows that the products exhibit compressed decahedral and belt-like microcrystals (Fig. S3C). Meanwhile, the XRD pattern shows impurity peaks of NaScMo<sub>3</sub>O<sub>12</sub>. When the molar ratio is then adjusted to 7, it is worth noting that the morphology of products all become belt-like microcrystals and all the characteristic diffraction peaks in Fig.S3A match well with the phase of NaScMo<sub>3</sub>O<sub>12</sub> (JCPDS file no. 28-1128). With the increase of the molar ratio of Mo/Sc (from 4.5 to 7), the concentration of Na<sup>+</sup> ions increase, which lead to the formation of NaScMo<sub>3</sub>O<sub>12</sub> phase.

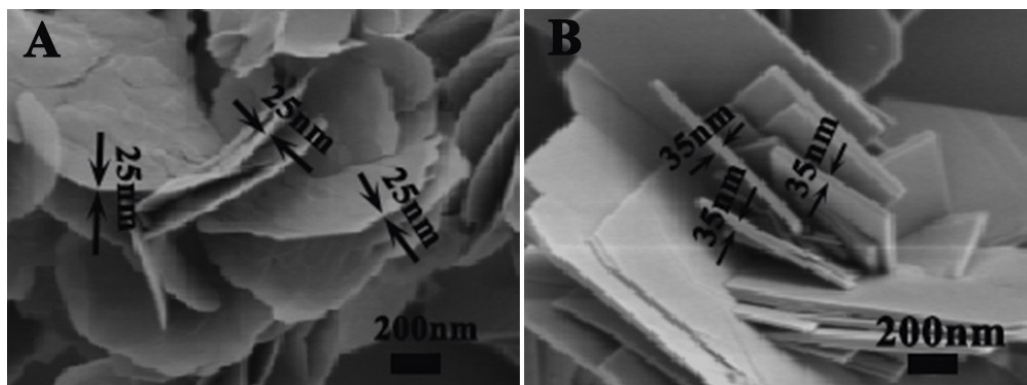

**Fig. S4** The thickness of scandium molybdate precursors prepared at different pH values (A: 2.5, B: 4.5)

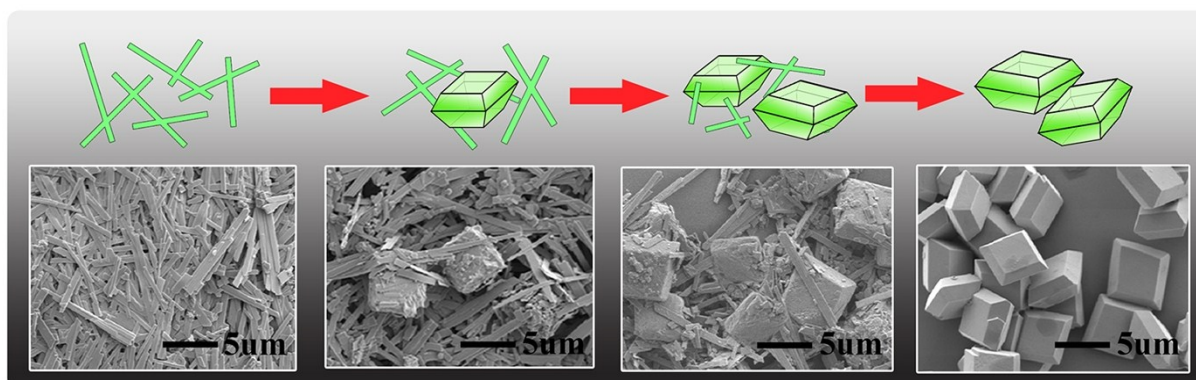

**Fig.S5** Schematic illustration for the conversion process from nanosheets to final chocolate-like precursor crystals

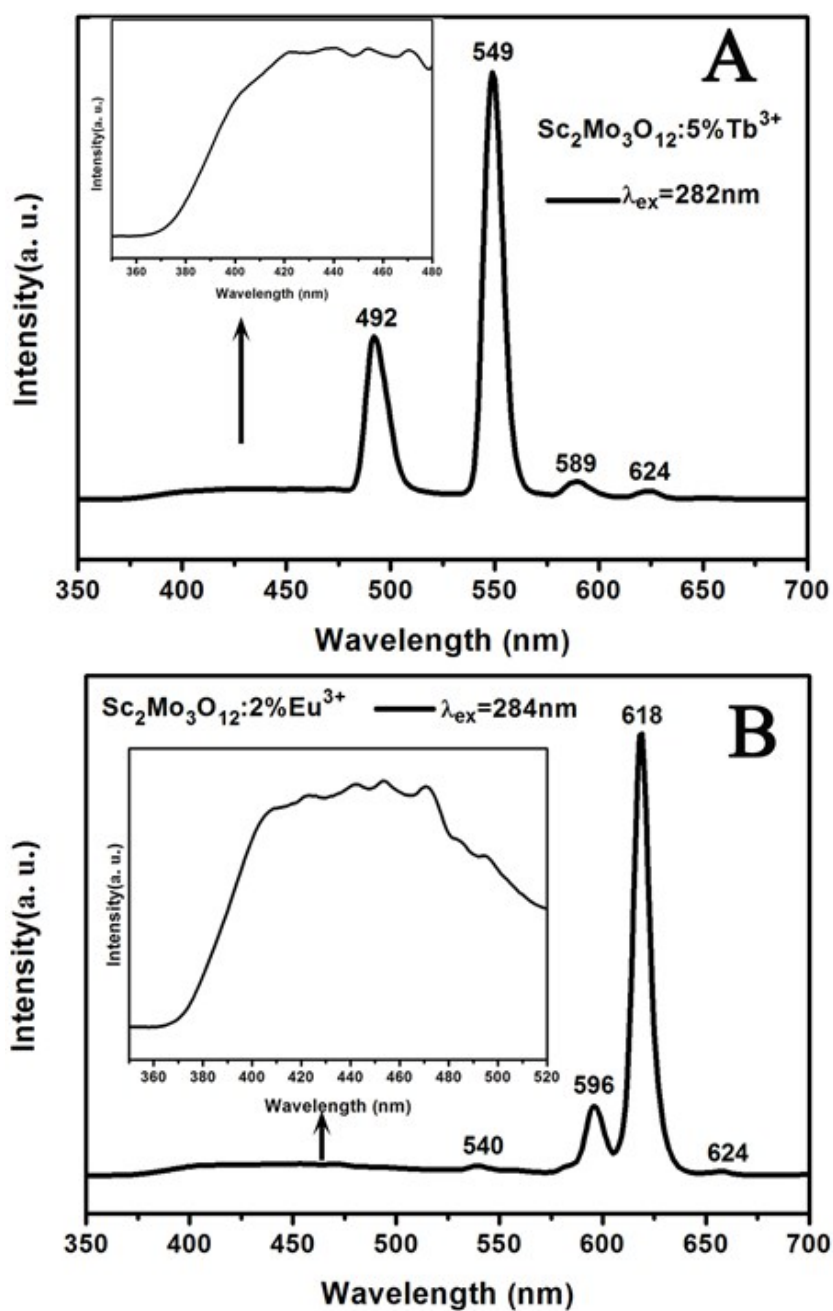

**Fig.S6** The emission spectra of  $\text{MoO}_4^{2-}$  in  $\text{Sc}_2\text{Mo}_3\text{O}_{12}:5\%\text{Tb}^{3+}$  samples (A), and  $\text{Sc}_2\text{Mo}_3\text{O}_{12}:2\%\text{Eu}^{3+}$  samples (B).

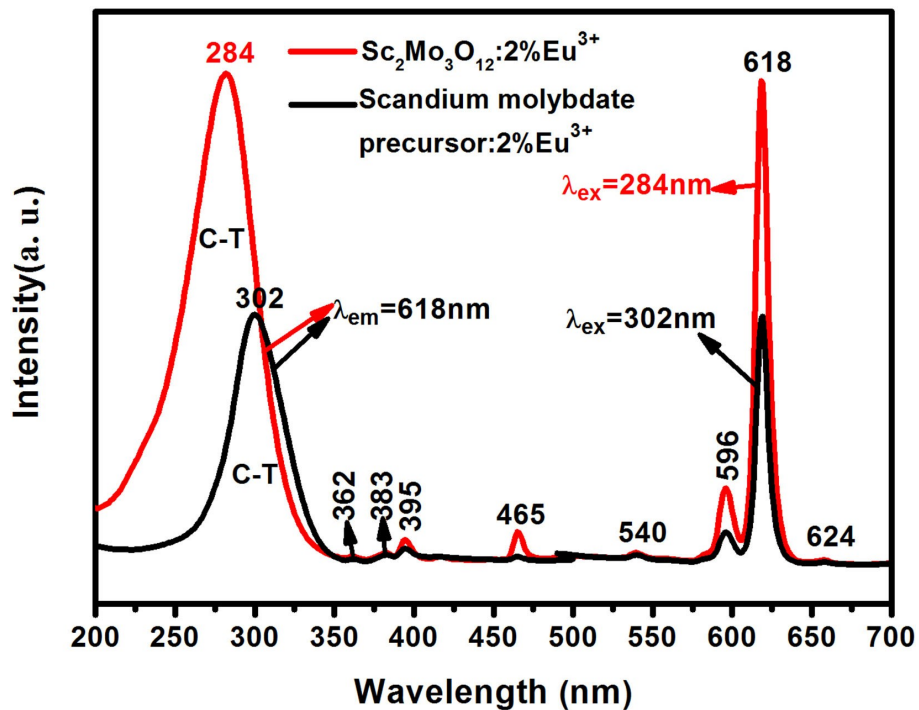

Fig.S7 The PL excitation and emission spectra of  $\text{Sc}_2\text{Mo}_3\text{O}_{12}:\text{2\%Eu}^{3+}$  samples (red line) and scandium molybdate precursor: $\text{2\%Eu}^{3+}$  samples (black line).
